# Supplementary material for: Solution-grown millimeter-scale Mn-doped CsPbBr3/Cs4PbBr6 crystals with enhanced photoluminescence and stability for light-emitting applications
Source: Royal Society of Chemistry journal article supplement (doi:10.1039/d3cp04371a), 2023-11-22
Supplement: d3cp04371a1.pdf [file d3cp04371a1.pdf]

## Supporting information

### **Solution-Grown Millimeter-Scale Mn-Doped CsPbBr<sub>3</sub>/Cs<sub>4</sub>PbBr<sub>6</sub> Crystals with Enhanced Photoluminescence and Stability for Light- Emitting Application**

Wenfang Peng,<sup>a</sup> Rongrong Hu,<sup>\*,a</sup> Bobo Yang,<sup>a</sup> Qiaoyun Wu,<sup>a</sup> Pan Liang,<sup>b</sup> Lin Cheng,<sup>c</sup> Xixi Cheng,<sup>a</sup> Yuefeng Li <sup>\*,a</sup> and Jun Zou <sup>\*,a</sup>

<sup>a</sup> School of Science, Shanghai Institute of Technology, Shanghai, 201418, China.

<sup>b</sup> State Key Laboratory of Precision Spectroscopy, East China Normal University, Shanghai 200241, China;

<sup>c</sup> College of Arts and Sciences, Shanghai Dianji University, Shanghai 201306, China

\* Corresponding author: Rongrong Hu, Yuefeng Li and Jun Zou

E-mail address: [hrr92@sit.edu.cn](mailto:hrr92@sit.edu.cn), [yf\\_li@sit.edu.cn](mailto:yf_li@sit.edu.cn), [zoujun@sit.edu.cn](mailto:zoujun@sit.edu.cn)

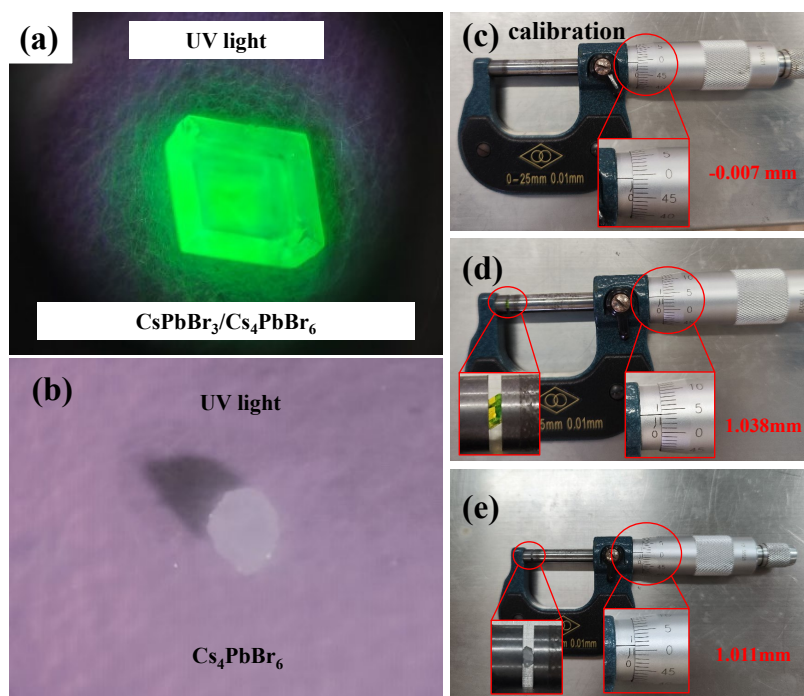

**Fig. S1** (a) Photograph of CsPbBr<sub>3</sub>/Cs<sub>4</sub>PbBr<sub>6</sub> crystals under UV light. ( $\lambda_{\text{ex}} = 395$  nm) (b) Photograph of pure Cs<sub>4</sub>PbBr<sub>6</sub> single crystals under UV light ( $\lambda_{\text{ex}} = 395$  nm). (c) The screw micrometer is zeroed, and the zero error is determined to be -0.007 mm. (d) Thickness measurement picture of CsPbBr<sub>3</sub>/Cs<sub>4</sub>PbBr<sub>6</sub> crystal. (e) Thickness measurement picture of Cs<sub>4</sub>PbBr<sub>6</sub> single crystal.

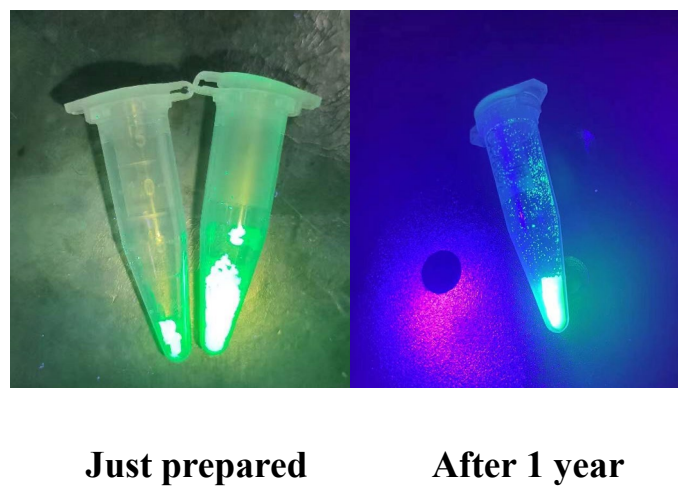

**Fig. S2** Photographs of CsPbBr<sub>3</sub>/Cs<sub>4</sub>PbBr<sub>6</sub> crystals ground into powder under UV light ( $\lambda_{\text{ex}} = 395$  nm).

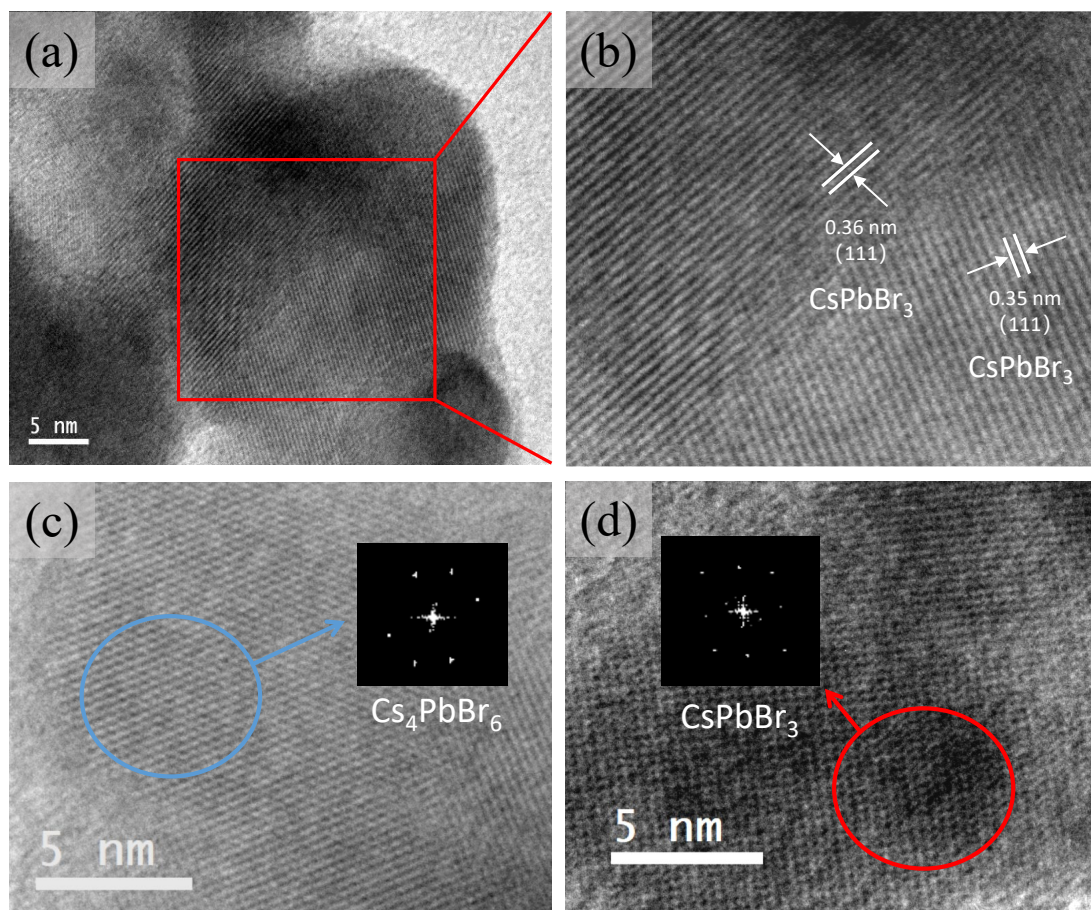

**Fig. S3** (a) Typical TEM image of a particle processed from as-grown  $\text{CsPbBr}_3/\text{Cs}_4\text{PbBr}_6$  crystals (b) The corresponding enlarged TEM image of panel a plotted with lattice spacing. (c) HRTEM image of the same particle with panel a processed from  $\text{CsPbBr}_3/\text{Cs}_4\text{PbBr}_6$  crystals. The inset is the corresponding FFT pattern. (d) Another HRTEM image of the same particle with panel a processed from  $\text{CsPbBr}_3/\text{Cs}_4\text{PbBr}_6$  crystals, and the inset is the corresponding FFT pattern.

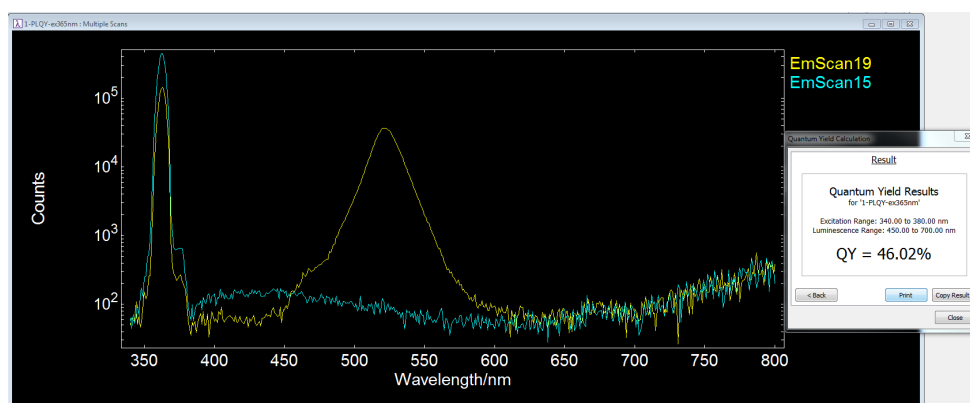

**Fig. S4** PLQY image of just prepared  $\text{CsPbBr}_3/\text{Cs}_4\text{PbBr}_6$  crystals.

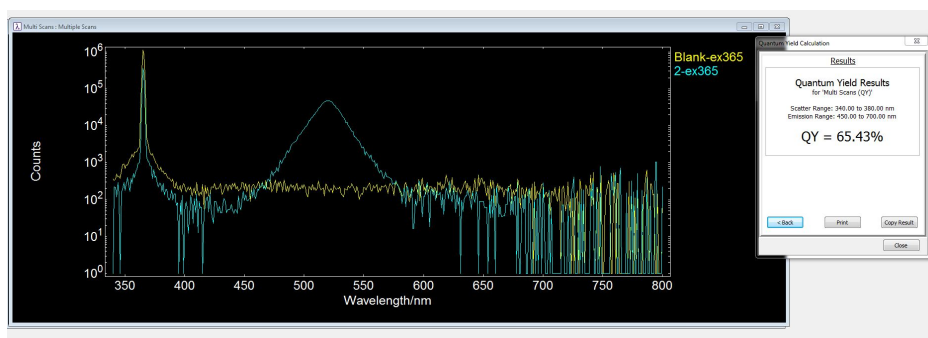

**Fig. S5** PLQY image of just prepared Mn-doped CsPbBr<sub>3</sub>/Cs<sub>4</sub>PbBr<sub>6</sub> crystals.

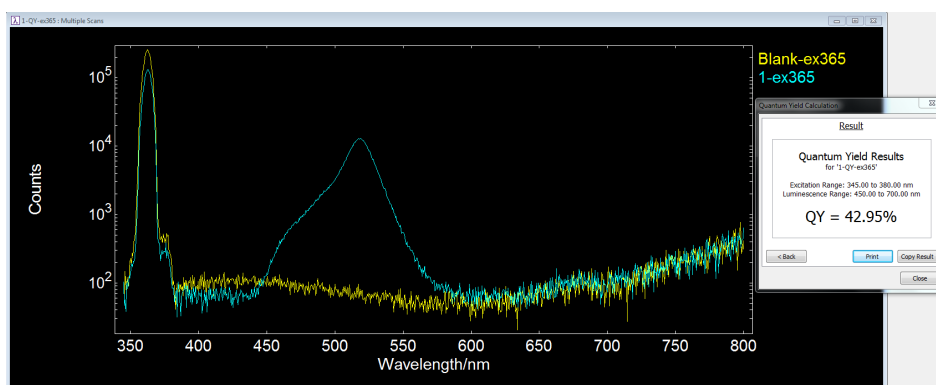

**Fig. S6** PLQY image of CsPbBr<sub>3</sub>/Cs<sub>4</sub>PbBr<sub>6</sub> crystals directly placed under an air atmosphere after three months.

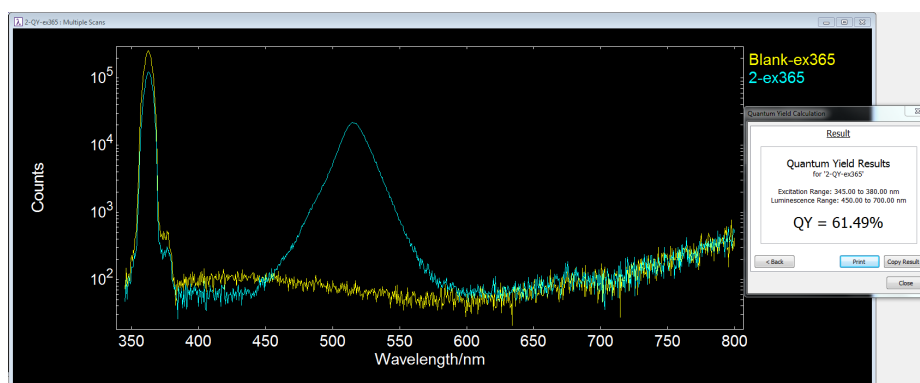

**Fig. S7** PLQY image of Mn-doped CsPbBr<sub>3</sub>/Cs<sub>4</sub>PbBr<sub>6</sub> crystals stored directly placed under an air atmosphere for three months.

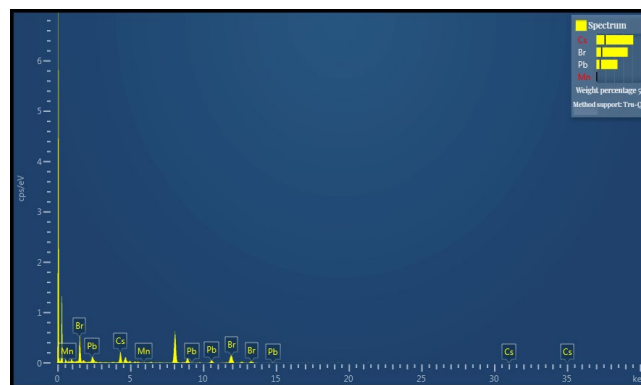

**Fig. S8** The EDS spectra of Mn-doped CsPbBr<sub>3</sub>/Cs<sub>4</sub>PbBr<sub>6</sub> crystals.

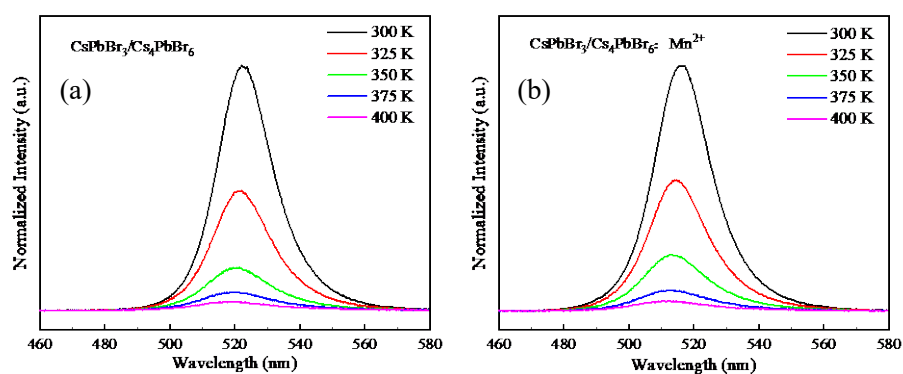

**Fig. S9** (a) The temperature-dependent PL spectra of CsPbBr<sub>3</sub>/Cs<sub>4</sub>PbBr<sub>6</sub> crystals. (b) The temperature-dependent PL spectra of Mn<sup>2+</sup> doped CsPbBr<sub>3</sub>/Cs<sub>4</sub>PbBr<sub>6</sub> crystals.

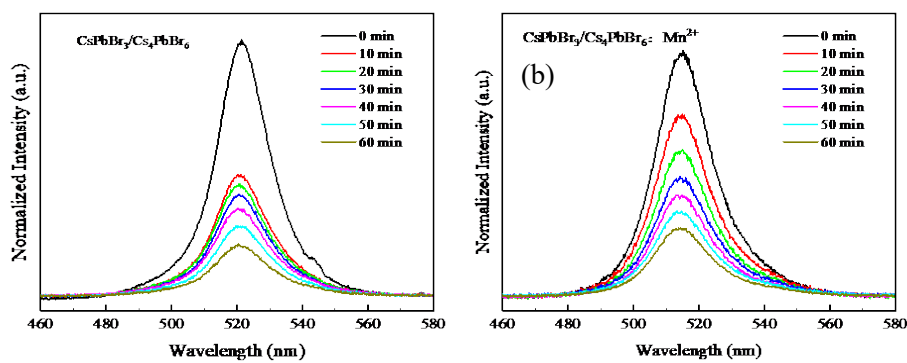

**Fig. S10** (a) PL spectra of CsPbBr<sub>3</sub>/Cs<sub>4</sub>PbBr<sub>6</sub> crystals under a humid condition with humidity of 70%. (b) PL spectra of Mn<sup>2+</sup> doped CsPbBr<sub>3</sub>/Cs<sub>4</sub>PbBr<sub>6</sub> crystals under a humid condition with humidity of 70%.

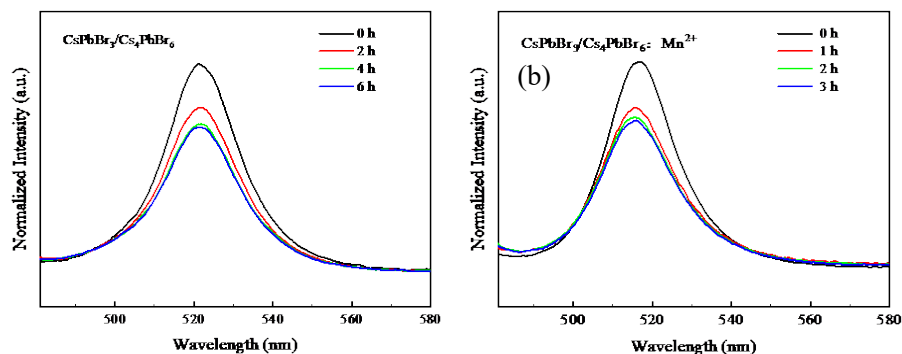

**Fig. S11** (a) The PL spectra of CsPbBr<sub>3</sub>/Cs<sub>4</sub>PbBr<sub>6</sub> crystals under 455 nm laser irradiation with a power density of 5 W/cm<sup>2</sup>. (b) The PL spectra of Mn<sup>2+</sup> doped CsPbBr<sub>3</sub>/Cs<sub>4</sub>PbBr<sub>6</sub> crystals under 455 nm laser irradiation with a power density of 5 W/cm<sup>2</sup>.

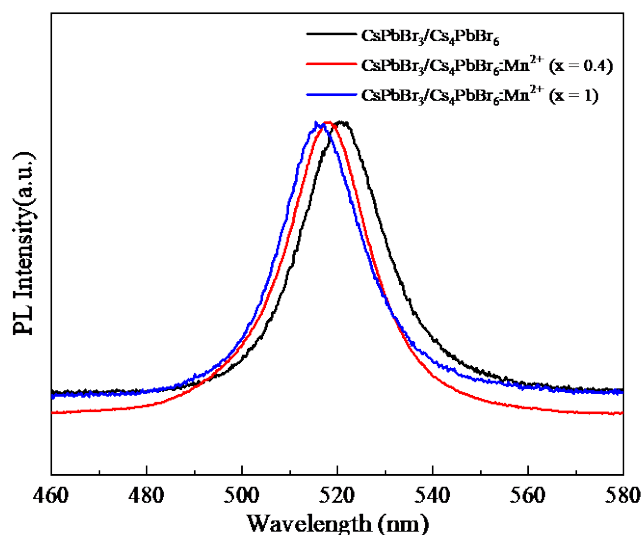

**Fig. S12** Normalized PL spectra of Mn-doped and undoped CsPbBr<sub>3</sub>/Cs<sub>4</sub>PbBr<sub>6</sub> crystals with different content of Mn<sup>2+</sup> ions. x is expressed as the amount of substance of MnBr<sub>2</sub> in the CsPbBr<sub>3</sub>/Cs<sub>4</sub>PbBr<sub>6</sub> crystal doped with Mn<sup>2+</sup> ions, x = 0.4 mmol and x = 1 mmol, respectively.

**Table S1** Summary of the EDS analysis of Mn-doped CsPbBr<sub>3</sub>/Cs<sub>4</sub>PbBr<sub>6</sub> crystals.

| Element | Wt%   | Wt%<br>Sigma |
|---------|-------|--------------|
| Mn      | 0.27  | 0.40         |
| Br      | 35.00 | 5.90         |
| Cs      | 41.19 | 9.64         |
| Pb      | 23.54 | 4.22         |
